# Supplementary material for: High yield exfoliation of sub-micron hexagonal boron nitride using a solvent free method
Source: Royal Society of Chemistry journal article supplement (doi:10.1039/d4nr02850c), 2024-01-01
Supplement: d4nr02850c1.pdf [file d4nr02850c1.pdf]

ARTICLE

Supplementary Information

Received 00th January 20xx,  
 Accepted 00th January 20xx

DOI: 10.1039/x0xx00000x

High Yield Exfoliation of a Sub-Micron hexagonal Boron Nitride  
 Using a Solvent Free Method

Diana Santiago,<sup>b</sup> Maricela Lizcano,<sup>b</sup> Sean P. McDarby,<sup>a</sup>  
 Ching-Cheh Hung,<sup>c</sup> and Baochau N. Nguyen\*<sup>a</sup>

**Table S1** (002) peak position and (002) FWHM of  $A_I$ -Cl and  $A_I$ -F

|                                 | (002) Peak position | (002) FWHM |
|---------------------------------|---------------------|------------|
| <b>A</b> – pristine <i>h</i> BN | 26.707              | 0.378      |
| <b>A<sub>I</sub></b> -LiCl      | 26.571              | 0.483      |
| <b>A<sub>I</sub></b> -NaCl      | 26.667              | 0.461      |
| <b>A<sub>I</sub></b> -KCl       | 26.686              | 0.487      |
| <b>A<sub>I</sub></b> -LiF       | 26.457              | 0.469      |
| <b>A<sub>I-H</sub></b> -NaF     | 26.628              | 0.485      |
| <b>A<sub>I-H</sub></b> -KF      | 26.571              | 0.487      |

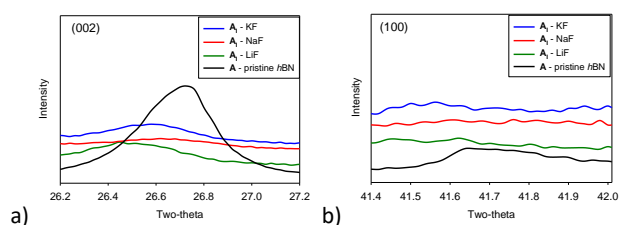

**Figure S1** (a) and (b) XRD patterns of intercalated  $A_I$ -F on both (002) and (100) planes, respectively, using fluoride salts as activation agents. Note that (002) plane of pristine *h*BN was scaled down for observation and comparison to the exfoliated  $A_I$ -Cl.

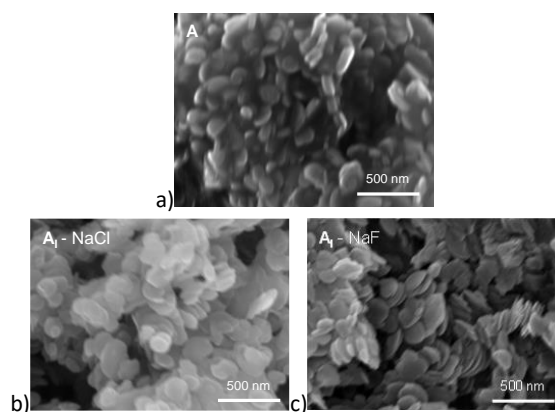

**Figure S2** SEM images of (a) pristine *h*BN, (b) intercalated  $A_I$  using NaCl and (c) intercalated  $A_I$  using NaF as activation agents.

<sup>a</sup> Universities Space Research Association, 425 3<sup>rd</sup> Street SW, Suite 950, Washington DC 20024. E-mail: [Baochau.n.nguyen@nasa.gov](mailto:Baochau.n.nguyen@nasa.gov); Tel: +1-216-433-2738

<sup>b</sup> NASA Glenn Research Center, 21000 Brookpark Road, Cleveland, OH, 44135. E-mail: [diana.santiago-dejesus@nasa.gov](mailto:diana.santiago-dejesus@nasa.gov); Tel: +1-216-433-6068.

<sup>c</sup> Boron Nitride Research and Engineering, LCC, Orlando, FL, 32827.

\*Corresponding author

**Table S2** (002) peak position and (002) FWHM of  $A_{I-H-Cl}$  and  $A_{I-H-F}$ 

|                          | (002) Peak position | (002) FWHM |
|--------------------------|---------------------|------------|
| A – pristine <i>h</i> BN | 26.707              | 0.378      |
| $A_{I-H-LiCl}$           | 26.707              | 0.389      |
| $A_{I-H-NaCl}$           | 26.707              | 0.335      |
| $A_{I-H-KCl}$            | 26.707              | 0.357      |
| $A_{I-H-LiF}$            | 26.745              | 0.362      |
| $A_{I-H-NaF}$            | 26.726              | 0.389      |
| $A_{I-H-KF}$             | 26.707              | 0.386      |

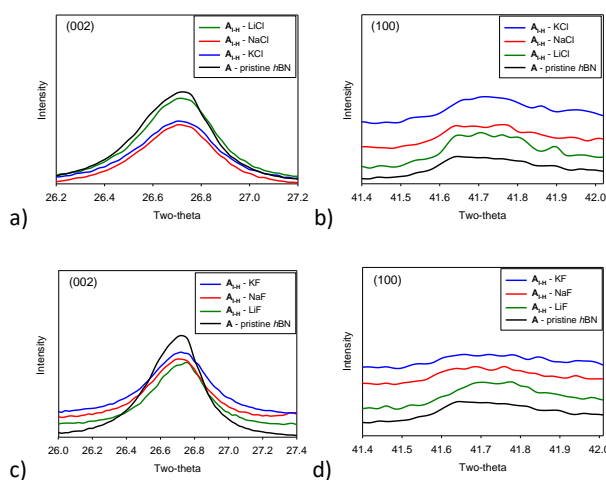**Figure S3** XRD patterns of a) (002) plane and b) (100) plane of exfoliated products,  $A_{I-H-Cl}$ , c) (002) plane and d) (100) plane of exfoliated products,  $A_{I-H-F}$ , respectively. Note that the intensity of (002) plane of pristine *h*BN was scaled down for observation and comparison to the exfoliated  $A_{E-H-Cl}$ .**Table S3** (002) peak position of  $A_{E-H-Cl}$  and  $A_{E-H-F}$ 

|                          | (002) Peak position |
|--------------------------|---------------------|
| A – pristine <i>h</i> BN | 26.707              |
| $A_E-LiCl$               | 26.724              |
| $A_E-NaCl$               | 26.707              |
| $A_E-KCl$                | 26.688              |
| $A_E-LiF$                | 26.745              |
| $A_E-NaF$                | 26.707              |
| $A_E-KF$                 | 26.707              |

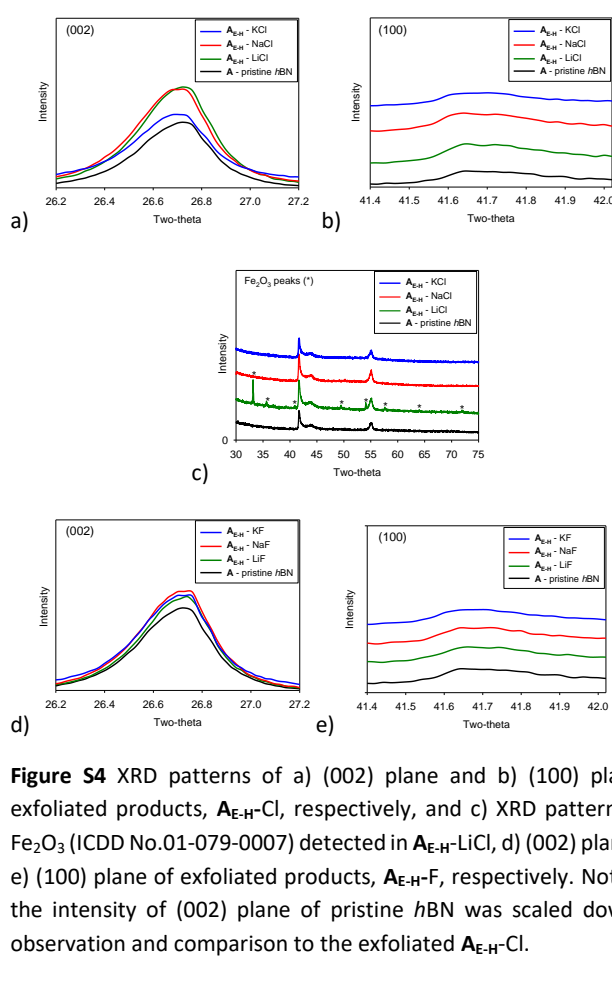**Figure S4** XRD patterns of a) (002) plane and b) (100) plane of exfoliated products,  $A_{E-H-Cl}$ , respectively, and c) XRD pattern of  $\alpha$ - $Fe_2O_3$  (ICDD No.01-079-0007) detected in  $A_{E-H-LiCl}$ , d) (002) plane and e) (100) plane of exfoliated products,  $A_{E-H-F}$ , respectively. Note that the intensity of (002) plane of pristine *h*BN was scaled down for observation and comparison to the exfoliated  $A_{E-H-Cl}$ .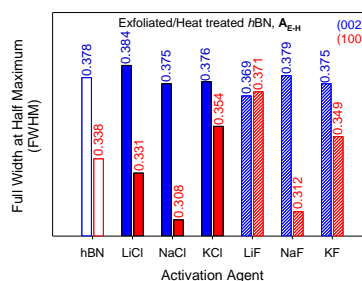**Figure S5** Full Width at Half Maximum (FWHM) of (002) and (100) planes of exfoliated/heat treated,  $A_{E-H}$ .**Table S4** % yield of  $A_{E-H}$  with different activation agents

| $A_{E-H}$      | % Yield |
|----------------|---------|
| $A_{E-H-LiCl}$ | >100    |
| $A_{E-H-NaCl}$ | >100    |
| $A_{E-H-KCl}$  | >100    |
| $A_{E-H-LiF}$  | 93.0    |
| $A_{E-H-NaF}$  | 83.6    |
| $A_{E-H-KF}$   | 91.0    |

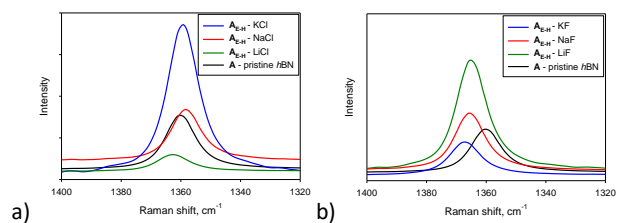

**Figure S6** Raman spectroscopy of a)  $A_{E-H-Cl}$  and b)  $A_{E-H-F}$ , compared to **A**.

**Table S5** Raman peak shift, peak height and FWHM of  $A_{E-H-Cl}$  and  $A_{E-H-F}$

|                                 | Peak shift<br>( $cm^{-1}$ ) | Peak<br>height | FWHM |
|---------------------------------|-----------------------------|----------------|------|
| <b>A</b> – pristine <i>h</i> BN | 1360.2                      | 2404           | 11.8 |
| $A_{E-H-LiCl}$                  | 1362.8                      | 723            | 13.6 |
| $A_{E-H-NaCl}$                  | 1358.3                      | 2242           | 11.9 |
| $A_{E-H-KCl}$                   | 1359.3                      | 6541           | 12.1 |
| $A_{E-H-LiF}$                   | 1365.1                      | 5986           | 13.5 |
| $A_{E-H-NaF}$                   | 1365.5                      | 3071           | 11.0 |
| $A_{E-H-KF}$                    | 1367.2                      | 1725           | 10.7 |
